# Supplementary material for: Analysis of the Key Elements of FFAT-Like Motifs Identifies New Proteins That Potentially Bind VAP on the ER, Including Two AKAPs and FAPP2
Source: PLOS journal article supplement (doi:10.1371/journal.pone.0030455), 2012-01-19
Supplement: S6 (10.1371/journal.pone.0030455.s006) [file journal.pone.0030455.s006]

Table S3: Possible new FFAT-like motifs in 18 proteins.

| Locus                                            | FFAT like motif                                                                             | pass or fail? | # sub-optimal elements | =Name of protein. + Comments on motif conservation/structure                                                                                                                 |
|--------------------------------------------------|---------------------------------------------------------------------------------------------|---------------|------------------------|------------------------------------------------------------------------------------------------------------------------------------------------------------------------------|
| New strong FFAT-like motifs meeting all criteria |                                                                                             |               |                        |                                                                                                                                                                              |
| AHNK2_HUMAN                                      | lqeeti <b>T</b> FFD <b>A</b> r <b>E</b> sf                                                  | ✓             | 1.5                    | =Ahnak2. Reasonably conserved in most distant orthologues (VFFDAQE in birds). Predicted to be an unstructured loop.                                                          |
| AKA11_HUMAN                                      | sdsevs <b>E</b> FFDS <b>f</b> Dqf                                                           | ✓             | 1                      | =AKAP220. #1: Precisely conserved in all orthologues. Predicted to be helical.<br>#2: Precisely conserved in all orthologues. Weakly predicted to be helical.                |
| AKA11_HUMAN                                      | vssied <b>D</b> FV <b>T</b> Af <b>E</b> hl                                                  |               | 2                      |                                                                                                                                                                              |
| ANR31_HUMAN                                      | ee <b>s</b> sl <b>e</b> T <b>F</b> V <b>S</b> A <b>E</b> sl                                 | ✓             | 2                      | =Ankyrin rpt domain-containing pr-31. Well conserved in all orthologues (mammals only). Predicted to be helical.                                                             |
| ARHGC_HUMAN                                      | l <b>dd</b> s <b>g</b> e <b>H</b> FFD <b>A</b> r <b>E</b> ah                                | ✓             | 1.5                    | =Rho GEF-12. Well conserved to most distant orthologue (frog: QFFDAQE). Predicted to be in a long unstructured loop.                                                         |
| CD19_HUMAN                                       | d <b>se</b> e <b>g</b> s <b>E</b> F <b>Y</b> EN <b>d</b> S <b>n</b> l                       | ✓             | 2                      | =B lymphocyte antigen CD19. Conserved in all mammals. Predicted in a long unstructured loop.                                                                                 |
| CQ053_HUMAN                                      | ee <b>f</b> ede <b>D</b> FL <b>S</b> Av <b>E</b> da                                         | ✓             | 1.5                    | =Uncharacterized protein C17orf53. Well conserved in all orthologues. Predicted to be helical.                                                                               |
| DVL3_HUMAN                                       | <b>s</b> e <b>l</b> ett <b>S</b> FFD <b>S</b> d <b>E</b> dd                                 | ✓             | 1.5                    | =Dishevelled 3. Well conserved in vertebrates. Not conserved in flies: SLFGTES. Predicted to be in an unstructured loop.                                                     |
| FA73B_HUMAN                                      | <b>s</b> lt <b>s</b> ed <b>S</b> FF <b>S</b> A <b>t</b> E <b>l</b> f                        | ✓             | 1.5                    | =C9orf54. Well conserved in mammals. SFVSTAE in birds. F3→A in insects. Predicted to be helical.                                                                             |
| FLIP1_HUMAN                                      | <b>t</b> s <b>p</b> t <b>s</b> e <b>E</b> FF <b>S</b> S <b>t</b> T <b>v</b> i               | ✓             | 2                      | =Filamin-A-interacting pr-1. Well conserved in all orthologues, DFFSSAT in frog. Predicted to be in a long unstructured loop.                                                |
| FRPD1_HUMAN                                      | d <b>g</b> <b>s</b> s <b>d</b> e <b>E</b> Y <b>D</b> Aa <b>D</b> kl                         | ✓             | 1.5                    | =FERM and PDZ domain-containing pr-1 (FRMPD1). Well conserved. EFFDARD in fish (most distant orthologues). Predicted to be in loop.                                          |
| FRPD1_MOUSE                                      | gg <b>s</b> s <b>d</b> e <b>E</b> Y <b>D</b> Aa <b>D</b> kl                                 |               | 2                      |                                                                                                                                                                              |
| NADAP_HUMAN                                      | <b>k</b> n <b>w</b> ede <b>D</b> F <b>Y</b> D <b>S</b> d <b>D</b> dt                        | ✓             | 2                      | =Kandaptin. Conserved in most eukaryotes e.g. DYYDSDE in <i>Trichoplax</i> , but not in flies & plants: DFYDRTK. Predicted to be in a short loop.                            |
| RASF3_HUMAN                                      | ee <b>d</b> a <b>e</b> d <b>F</b> FF <b>T</b> A <b>r</b> <b>T</b> sf                        | ✓             | 2                      | =Ras association domain-containing pr-3 (RASSF3). Reasonably conserved, e.g. LFYTART in frog. Weakly predicted to form a helix.                                              |
| RHPN1_HUMAN                                      | <b>e</b> ld <b>r</b> ed <b>D</b> F <b>C</b> E <b>A</b> a <b>E</b> ap                        | ✓             | 1.5                    | =Rhopilin-1. Well conserved, e.g. fish DFCEVAE sea squirt: DFFDIVE + flank more acidic. Lies after helix 12 of BRO1 domain.* Absent in Rhpn-2.                               |
| RHPN1_MOUSE                                      | ql <b>r</b> ed <b>D</b> FF <b>E</b> A <b>t</b> E <b>a</b> p                                 |               | 1                      |                                                                                                                                                                              |
| S22AF_HUMAN                                      | <b>e</b> seeeee <b>E</b> F <b>Y</b> D <b>A</b> d <b>E</b> et                                | ✓             | 0.5                    | =Solute carrier (SLC)-22 member 15/Flpt. Conserved to most distant orthologue (lizard: EFFDADE). Weakly predicted to be helical.                                             |
| S22AF_MOUSE                                      |                                                                                             |               |                        |                                                                                                                                                                              |
| SCN4A_HUMAN                                      | <b>g</b> ed <b>d</b> <b>f</b> e <b>M</b> F <b>Y</b> <b>E</b> T <b>w</b> <b>E</b> k <b>f</b> | ✓             | 2                      | =Sodium channel protein type 4/10 subunit alpha. Well conserved in mammals and some fish, but in other fish T5→Ø. Not conserved in flies (MYYEIWQ). Predicted to be helical. |
| SCNAA_HUMAN                                      | <b>s</b> ed <b>d</b> <b>f</b> d <b>M</b> F <b>Y</b> <b>E</b> T <b>w</b> <b>E</b> k <b>f</b> |               | 2                      |                                                                                                                                                                              |

|              |                 |   |     |                                                                                                                                                                                  |
|--------------|-----------------|---|-----|----------------------------------------------------------------------------------------------------------------------------------------------------------------------------------|
| SPKAP_HUMAN  | lssieeDFLTAsEhl | ✓ | 2   | =AKAP110. Perfectly conserved in all orthologues (incl. fish). Weakly predicted to be helical. Well conserved in all orthologues incl. fish. Predicted to be helical.            |
| SSH2_HUMAN   | fstdriDFFSAIEkf | ✓ | 2   | =Slingshot homolog 2. Well conserved to birds/fish. F3L in frog. Motif not in fly SSH. Predicted helical.                                                                        |
| TACC1_HUMAN  | epeedlEYFECsNvp | ✓ | 2   | =Transforming acidic coiled-coil-containing pr-1. Motif stronger in frogs EFFECTS, but missing in fish orthologues. Predicted to be in a long loop.                              |
| THMS1_BOVIN  | plsqegEFYECeDeh | ✓ | 2   | =Thymocyte-expressed molecule involved in selection (THEMIS). Well conserved to most distant orthologue: EFYECAD in fish. E1K in birds. Predicted to be in an unstructured loop. |
| THMS1_HUMAN  | plsqegEFYECeDer |   | 2   |                                                                                                                                                                                  |
| THMS1_MOUSE  | plsqegEFYECeDeh |   | 2   |                                                                                                                                                                                  |
| VPS13A_HUMAN | eddseeEFFDApCsp | ✓ | 1.5 | =Vps13A / chorein. Conserved in all Vps13A orthologues, e.g. EFYDAPT in frog. Predicted to be in long extended loop. In same position as motif in Vps13C (see above).            |
| VP13C_HUMAN  | esesddEYFDAeDge |   | 1   | =Vps13C. Well conserved even to fungi: EFVDAVS in <i>S. pombe</i> . Predicted to be in long extended loop. In same position as motif in Vps13A (see above).                      |
| VP13C_MOUSE  | esesdeEFFDAeDgd |   | 0   |                                                                                                                                                                                  |
| ZFY27_HUMAN  | eaepdeEFKDAiEet | ✓ | 1.5 | =Protrudin. (also called SPG33). Conserved in all orthologues incl. fish. Predicted helical.                                                                                     |

#### Known VAP interactors

|                                        |                 |         |     |                                                                                                                                    |
|----------------------------------------|-----------------|---------|-----|------------------------------------------------------------------------------------------------------------------------------------|
| GLTP ( <i>H. sapiens</i> )             | avshlpPFFDClGsp | (B & D) | 3.5 | See text. Conserved in fish, not invertebrates (see Fig 3A). <b>BUT:</b> PFFD in 3/10-helix (helix 2) in crystal structure (1SWX). |
| Orp3a ( <i>A. thaliana</i> )           | gqkfapKWFDEtEev | B,C & D | 6   | See text. Not well conserved, e.g. RWFNLTD in maize.                                                                               |
| USP20 (guinea pig)                     | SpseedEFLSCdSss | ✓       | 2   | Reasonably conserved in all vertebrates. Weaker motif in closest homologue USP33.                                                  |
| RMD3 ( <i>Nematostella vectensis</i> ) | ssddedEFYEApQde | ✓       | 2   | =PTPIP51. Reasonably well conserved, e.g. VYFTASS in human (see Figure S3). In unstructured region. Also weaker motif in RMD2      |

#### Fail criterion (A): Not located in cytoplasm

|             |                 |       |     |                                                                                    |
|-------------|-----------------|-------|-----|------------------------------------------------------------------------------------|
| A1AG_RABIT  | speqlEYFEAlTcl  | A     | 2   | = alpha-1 acid glycoprotein. Extracellular.                                        |
| A1AG1_HUMAN | tkeqlgEFYEAIDcl | A     | 2   |                                                                                    |
| A1AG2_HUMAN | tkeqlgEFYEAIDcl | A     | 2   |                                                                                    |
| ACCN2_HUMAN | tmdsdLDFFDSySit | A     | 1.5 | =Amiloride-sensitive cation channel 2. Extracellular.                              |
| ALMT1_ARATH | lqdfgdEYFEArEkG | A     | 2   | =Aluminium-activated malate transporter 1/2 ( <i>Arabidopsis</i> ). Extracellular. |
| ALMT2_ARATH | lqefgdEYFEAtEdg |       |     |                                                                                    |
| FA69C_HUMAN | tgdcdcNFFDCfSrc | A     | 2   | =C18orf51. Extracellular.                                                          |
| PCDB9_HUMAN | naevsySFFDAsEdi | A     | 2   | =Protocadherin beta-9/10. Extracellular.                                           |
| PCDBA_HUMAN |                 |       |     |                                                                                    |
| YCF1_OENEH  | lkkelkDYFEAqElf | A & D | 2.5 | =Ycf1 (plastid). (and poorly conserved: e.g. DYFGAQQ in closest orthologue)        |

Fail criterion (B): occur in helix of known crystal/NMR structure

|             |                  |   |     |                                                                                                                                                                                                                             |
|-------------|------------------|---|-----|-----------------------------------------------------------------------------------------------------------------------------------------------------------------------------------------------------------------------------|
| AP3M1_HUMAN | sqsvcdYFFEaQEka  | B | 2   | =μ-adaptin 3A. Not as well conserved as surrounding residues, e.g. YYLEAQR in <i>Tribolium</i> . In helix 1 of MU-1 (2VGL)                                                                                                  |
| KAT1_HUMAN  | eviiiePFFDCyEpm  | B | 2   | =Kynurenine aminotransferase I. Fully conserved in vertebrates. However, forms part of internal substrate pocket.                                                                                                           |
| LCK_HUMAN   | lrsvleDFFTAteGgq | B | 2   | =Lck tyrosine kinase. Absolutely conserved in ALL vertebrate Src-like kinases (±F3Y), invertebrates lose 2 <sup>nd</sup> half: e.g. EFFVMEG in sea urchin. Structure: 1 <sup>st</sup> half is in helix 13 of kinase domain. |
| MAOX_HUMAN  | yddfldEFMEAvSsk  | B | 2   | =NADP-dependent malic enzyme. In helix 16 of structure. Also: residue 4 not conserved in fish: EFMKAIT.                                                                                                                     |
| NOM1_HUMAN  | timtseDFLDAfEkl  | B | 2   | =Nucleolar MIF4G domain-containing protein 1. In helix 2 of MA3 domain.                                                                                                                                                     |
| NOP2_SCHPO  | svseavEFFEAnEmp  | B | 1   | =ribosomal RNA methyltransferase (nucleolar protein 2). Well conserved, EFLEANE in human. But, lies in helix 3 of methyltransferase domain.                                                                                 |
| NOP2_YEAST  | spaeamEFFEAnEia  | B | 1.5 |                                                                                                                                                                                                                             |
| S14L6_HUMAN | giellqEFFSAIEan  | B | 2   | =Putative SEC14-like protein 6. In helix 7 of conserved Sec14 structure.                                                                                                                                                    |
| TBAL3_HUMAN | egmeeEFLEArEdl   | B | 1.5 | =Tubulin alpha chain-like 3. In helix 16 of tubulin alpha-1C domain                                                                                                                                                         |
| ZBT11_HUMAN | ctqcekSFFEARdlr  | B | 2   | =Zinc finger and BTB domain-containing pr-11. Well conserved in orthologues: e.g. RFYEAKD in fish. But 2 <sup>nd</sup> half in helix of 7 <sup>th</sup> C2H2 Zn finger.                                                     |

Fail criterion (C): core residues (FFD) not well conserved in orthologues

|             |                 |   |     |                                                                                                                                     |
|-------------|-----------------|---|-----|-------------------------------------------------------------------------------------------------------------------------------------|
| ATG1_ASPOR  | ermnfsDFFDCdTt  | C | 2   | =Autophagy-related pr-1 ( <i>Aspergillus oryzae</i> ). Poor conservation e.g. DFFQNGV in other <i>Aspergillus</i>                   |
| ATMIN_HUMAN | idfdieEFFSAsNiq | C | 2   | =ATM/ATR-substrate CHK2-interacting Zn finger pr. Conserved in mammals/birds, but not in distant orthologues, e.g. EFLNATH in fish. |
| CDR1_HUMAN  | dfledpDFLEAiDlr | C | 1.5 | =Cerebellar degeneration-related antigen 1. Along with 5 DFLED repeats. Not conserved in close orthologues, e.g. DFLEAMN in horse.  |
| CEBPZ_HUMAN | esddeNFIDAnDde  | C | 2   | =CCAAT/enhancer-binding pr. zeta. Only conserved in mammals. CFKDQEE in birds.                                                      |
| CHCH1_MOUSE | crkeiqDFFDCsSra | C | 2   | =Coiled-coil-helix-coiled-coil-helix domain-containing pr-1. Very poorly conserved, e.g. GFLDCAA in chimp                           |
| DCL2_PHANO  | ivsdveEFFDAAdgg | C | 1   | =Dicer-like protein 2 ( <i>Phaeosporia</i> ). Only conserved in closest orthologues in <i>leptosporia</i> and <i>pyrenophora</i> .  |
| DSEL_HUMAN  | teleidSFVDAcEwk | C | 2   | =Dermatan-sulfate epimerase-like pr. Not well conserved, e.g. SLLDACE in fish.                                                      |
| E41LA_HUMAN | dcnetsFFFEArSk  | C | 2   | =Band 4.1-like protein 4A. Not well conserved as surrounding residues, e.g. FFFKAPN in fish.                                        |

|             |                  |   |     |                                                                                                                                            |
|-------------|------------------|---|-----|--------------------------------------------------------------------------------------------------------------------------------------------|
| ERO1A_HUMAN | hddssdNFCEAdDiq  | C | 2   | =Endoplasmic oxidoreductin-1-like pr. Key residues not conserved. QFCDD in sea squirt.                                                     |
| FA21A_HUMAN | dgdddddFFSAPhSk  | C | 2   | =WASH complex subunit FAM21A/B/C. Not conserved in close orthologues; NFFMPSS in rat                                                       |
| FA21B_HUMAN | dgdddddFFSAPhSk  | C | 2   |                                                                                                                                            |
| FA21C_HUMAN | dgdddddFFSAPhSk  | C | 2   |                                                                                                                                            |
| FH5_ORYSJ   | svdtgeEFYEAEEdw  | C | 1   | =Formin-like protein 5 (rice). Poorly conserved, e.g. EIFSEAE in <i>Arabidopsis lyrata</i> .                                               |
| FKBP6_HUMAN | feieillDFLDCaEsd | C | 2   | =FK506 binding pr-6. Conserved in mammals, less so in fish: DFLDSGQ. Predicted to be at end of beta strand 7 and in loop following.        |
| GSTA4_HUMAN | gvefdeEFLETkEq1  | C | 2   | =Glutathione S-transferase A4-4. Key residue not conserved compared to nearby residues. EMETRE in frog.                                    |
| HELB_HUMAN  | eedeesVFIDAeElc  | C | 2   | =Helicase B. Better in some mammals (EFVDAEE). But less conserved in fish: EFLDMKE. Motif absent in birds. Weakly predicted to be helical. |
| HOT_HUMAN   | veptdsSFMEAIEfa  | C | 2   | =Hydroxyacid-oxoacid transhydrogenase. Poor conservation compared to surrounding residues. SFKAAID in fish.                                |
| IL1B_HUMAN  | ifeeeppIFFDTwDne | C | 2   | =Interleukin-1 beta (precursor). Poorly conserved in mammals, e.g. dog has only acidic tract and no other discernible elements.            |
| JMJD4_HUMAN | ssdwlnEFWDAlDvd  | C | 2   | =JmjC domain-containing pr-4. Only 1 <sup>st</sup> half of motif conserved in invertebrates: e.g. EFWDHRQ in sea urchin.                   |
| KSL10_ORYSJ | litvydDFFDCpEis  | C | 1.5 | =Ent-kaurene synthase-like 10 (rice), Poorly conserved, e.g. DFFDGE in closest homologue also in rice.                                     |
| LIMK2_BOVIN | afskleDFFEAlSly  | C | 2   | =LIM domain kinase 2. Poorly conserved, e.g. DSFEALS in closest orthologue (horse)                                                         |
| MLCB_DICDI  | teaeiteEFFEAAdpn | C | 0.5 | =Myosin-IB light chain (slime mold) Poorly conserved, e.g. EFLAAAD in close orthologue ( <i>D. fasciculatum</i> )                          |
| MTH7_DROME  | maiiideEFFDCdEmi | C | 1.5 | =Methusaleh-7 (fruit fly). Poorly conserved, e.g. PFLSCDE in close orthologue ( <i>D. yakuba</i> )                                         |
| ORC2_HUMAN  | tsdlveEYFEAhSss  | C | 2   | =Origin recognition complex subunit 2. E4 poorly conserved beyond mammals. e.g. Q4 in fish. Weakly predicted to be helical.                |
| NRBF2_HUMAN | eldvdaDFVETsElw  | C | 2   | =Nuclear receptor-binding factor 2. Key residue not conserved: T5→K e.g. in mouse.                                                         |
| PK1IP_HUMAN | gdeeviRFFDCdSlv  | C | 2   | =p21-activated protein kinase-interacting protein 1 (hPIP1). Key residue not conserved: F2→I e.g. in mouse                                 |
| PKHM3_HUMAN | alevteEFFSTlDsn  | C | 2   | =Pleckstrin homology domain-containing family M member 3. Conserved in mammals, but S4→N in birds. Predicted to be helical.                |
| R51A1_HUMAN | dseddsDFCESEdNd  | C | 1.5 | =RAD51-associated pr-1. Poorly conserved in mammals, e.g. rat has DFDESEE.                                                                 |
| RTL1_HUMAN  | dsdhsetFYECpSta  | C | 1.5 | =Retrotransposon-like pr-1 (PEG11) .Poorly conserved, e.g. GFYGYGY in pig                                                                  |

|             |                  |   |     |                                                                                                                                            |
|-------------|------------------|---|-----|--------------------------------------------------------------------------------------------------------------------------------------------|
| TSYL2_HUMAN | dfmettDYFETtDne  | C | 2   | =Testis-specific Y-encoded-like pr-2. Key residue not conserved: Y2→ <u>C</u> e.g. in dog.                                                 |
| YG044_BOVIN | pvgseeEFYDCpDyy  | C | 1.5 | =Uncharacterized protein ENSP00000370281 homologue. Poorly conserved, e.g. F2 substituted in closest orthologues e.g. F2→ <u>L</u> in pig. |
| YRO7_CAEEL  | dsep dqEFYDAqEge | C | 1   | =Uncharacterized protein R07G3.7 ( <i>C. elegans</i> ). Poorly conserved, e.g. <u>AFLEAKK</u> in close orthologue in <i>C. briggsae</i>    |

#### Fail criterion (D): more than 2 suboptimal elements in motif

|             |                  |       |     |                                                                                                                                                  |
|-------------|------------------|-------|-----|--------------------------------------------------------------------------------------------------------------------------------------------------|
| COG4_CAEEL  | mtmqdvEYYEAhDpf  | D & C | 3   | =Conserved Oligomeric Golgi component 4 ( <i>C. elegans</i> ). Conserved in genus, but not in related <i>Brugia</i> : <u>ADFEAED</u>             |
| CQ072_HUMAN | dvppasDYDDAeSll  | D     | 3.5 | =C17orf72. Conserved in mammals but not fish orthologues, e.g. <u>EHYEVE</u> .                                                                   |
| CQ072_MOUSE | dvppasDYDDAeSlp  |       |     |                                                                                                                                                  |
| HCYA_ENTDO  | rlladsDYDDAwTdn  | D & C | 3.5 | =Hemocyanin A-type (Octopus). Not well conserved, e.g. <u>NYYYVWR</u> in <i>Aplysia</i> .                                                        |
| HCYG_ENTDO  | rlladsDYDDAwTdn  |       |     |                                                                                                                                                  |
| MCP_CAVPO   | sdvqvfeEYFEAvTys | D & C | 3   | =Membrane cofactor precursor ( <i>Cavia porcellus</i> ). Not well conserved, e.g. <u>QYREAVI</u> in Chinese hamster.                             |
| MFH1_SCHPO  | ngysvdEYFDAnDsn  | D & C | 2.5 | =ATP-dependent DNA helicase ( <i>S. pombe</i> ). Very poorly conserved, <u>EFMNRNV</u> in <i>S. japonicus</i> .                                  |
| MRT4_CANGA  | tlDtvkEYFEAySrl  | D & C | 3   | =mRNA turnover protein 4 ( <i>Candida</i> ). Poorly conserved, <u>EYFKSYV</u> in <i>S. cerevisiae</i> .                                          |
| ORC2_MOUSE  | asdlveEYFEAhSss  | D     | 2.5 | =Origin recognition complex subunit 2. E4 poorly conserved beyond mammals. Q4 found in fish. Weakly predicted to be helical                      |
| ORC2_RAT    | agdlveEYFEAhSss  |       | 2.5 |                                                                                                                                                  |
| ORC2_XENLA  | asnlvEEYFEAhSss  |       | 3   |                                                                                                                                                  |
| RAD2_YEAST  | heknyvEYFD AeSil | D & C | 2.5 | =DNA repair protein RAD2 ( <i>S. cerevisiae</i> ). Poorly conserved compared to adjacent residues, e.g. <u>ECYMQDD</u> in <i>C. tropicalis</i> . |
| SLX1_BOTFB  | keqelvdYFDAdEf   | D & C | 2.5 | =structure-specific endonuclease subunit slx1 (noble rot fungus). Very poorly conserved – only in one species.                                   |
| WIT2_ARATH  | eeiireDYFEAL Ssr | D & C | 2.5 | =WPP dom.-interacting tail-anchored pr-2 ( <i>Arabidopsis</i> ). Poorly conserved, e.g. <u>EHGEAVS</u> in <i>A. lyrata</i>                       |
| YEOB_SCHPO  | aattdyEYDAdTpt   | D & C | 3   | =uncharacterized beta-glucosidase ( <i>S. pombe</i> ). Poorly conserved, <u>EWYDPDA</u> in <i>S. japonicus</i> .                                 |

New FFAT-like motifs (and flanking residues) from two groups of candidate proteins (1) human proteins containing motifs with 2 or less suboptimal elements (column 4, see Table S3), and (2) proteins of any species with motifs among the 127 simple variants of FFAT (see Table S1) were assessed by four criteria:

- (A) location in cytoplasm;
- (B) known not to form a helix in published crystallographic/NMR structures;
- (C) specific conservation across evolution of key FFAT residues compared to adjacent residues in orthologues of the protein. Poorly conserved residues in orthologues are underlined. Where residues in evolutionary distant orthologues fit FFAT better, they are in bold;
- (D)  $\leq 2.0$  sub-optimal elements, calculated as in Table S2.

21 motifs passed all four criteria; these appear in a section at the top bounded with red tram lines, and are marked with a tick in column 3. Three of these are already referred to in the text: AKAP110, AKAP220 and protrudin, leaving 18 new FFAT-like motifs.

A second short section of the table shows the FFAT-like motifs from known VAP interactors GLTP, Orp3a, USP20 and RMD3 analyzed in the same manner. All other motifs failed one or more of the criteria, and are shown grouped according to the criterion they fail. Alternative names and information on the reasons for failing criteria are given for each protein.
